# Supplementary material for: Heavy Metal Accumulation and Phytoremediation Potentiality of Some Selected Mangrove Species from the World’s Largest Mangrove Forest
Source: MDPI journal article supplement (doi:10.3390/biology11081144), 2022-07-29
Supplement: s1 [file s1]

Article

# Heavy metal accumulation and phytoremediation potentiality of some selected mangrove species from the world's largest mangrove forest

M. Belal Hossain<sup>1,2,\*</sup>, Zobaer Masum<sup>1</sup>, M. Safiur Rahman<sup>3</sup>, Jimmy Yu<sup>2</sup>, Md. Abu Noman<sup>4</sup>, Yeasmin N. Jolly<sup>3</sup>, Bilkis A. Begum<sup>3</sup>, Bilal Ahamad Paray<sup>5</sup> and Takaomi Arai<sup>6</sup>

<sup>1</sup> Department of Fisheries and Marine Science, Noakhali Science and Technology University, Noakhali, 3814, Bangladesh; belal.hossain@nstu.edu.bd; zobaermasum12@gmail.com

<sup>2</sup> School of Engineering and Built Environment, Griffith University, Brisbane, QLD 4111, Australia; jimmy.yu@griffith.edu.au

<sup>3</sup> Chemistry Division, Atomic Energy Centre Dhaka (AECD), Bangladesh Atomic Energy Commission Dhaka 1000, Bangladesh, safiur.rahman@dal.ca, jolly\_tipu@yahoo.com, bilksab@baec.gov.bd

<sup>4</sup> State Key Laboratory of Biogeology and Environmental Geology, China University of Geosciences (Wuhan), Wuhan 430074, PR China, abu.noman.nstu@gmail.com

<sup>5</sup> Department of Zoology, College of Science, King Saud University, PO Box 2455, Riyadh, 11451, Saudi Arabia bparay@ksu.edu.sa

<sup>6</sup> Environmental and Life Sciences Programme, Faculty of Science, Universiti Brunei Darussalam, Jalan Tungku Link, Gadong, BE 1410, Brunei Darussalam.; e-mail: takaomi.arai@ubd.edu.bn

\* Correspondence (mbhnstu@gmail.com)

**Table S1.** Analytical results obtained on certified reference materials (mg/kg) and the limit of detection (LOD) of the instrument (EDXRF, Epsilon 5, PANalytical, The Netherlands).

| Element | LOD | Certified reference values | Values found | RE (%) | Recovery (%) |
|---------|-----|----------------------------|--------------|--------|--------------|
| Cr      | 2.0 | 77.2                       | 76.9         | 0.31   | 99.7         |
| Mn      | 2.5 | 1180                       | 1125         | 4.66   | 95.3         |
| Fe      | 1.1 | 27100                      | 26112        | 3.65   | 96.4         |
| Cu      | 1.0 | 32.7                       | 30.6         | 6.33   | 93.7         |
| Zn      | 0.7 | 74.8                       | 72.7         | 2.86   | 97.1         |
| Ni      | 1.2 | 9.7                        | 10.1         | 4.12   | 104.1        |
| As      | 0.4 | 18.3                       | 17.7         | 3.22   | 96.8         |
| Pb      | 0.9 | 22.8                       | 22.5         | 1.54   | 98.5         |

Table S2. Metal concentrations in the root and leaves of three mangrove plants

|               | <i>E. agallocha</i> |           | <i>A. officinalis</i> |           | <i>S. apetalla</i> |           |
|---------------|---------------------|-----------|-----------------------|-----------|--------------------|-----------|
|               | Station 1           | Station 2 | Station 1             | Station 2 | Station 1          | Station 2 |
| <b>Roots</b>  |                     |           |                       |           |                    |           |
| Cu            | 125.9135            | 248.222   | 188.7745              | 218.5015  | 138.7165           | 154.6535  |
| Zn            | 758.171             | 820.7805  | 619.392               | 532.5765  | 834.551            | 421.976   |
| Fe            | 12.8345             | 17.9205   | 19.787                | 16.3735   | 15.763             | 16.32     |
| Mn            | 8.467               | 10.339    | 12.5335               | 8.814     | 8.5165             | 9.3535    |
| Sr            | 10.323              | 21.871    | 19.877                | 11.6745   | 21.1805            | 14.855    |
| <b>Leaves</b> |                     |           |                       |           |                    |           |
| Cu            | 149.888             | 158.5095  | 456.2655              | 154.058   | 285.6475           | 170.195   |
| Zn            | 1210.819            | 396.511   | 325.187               | 413.128   | 760.2575           | 322.6345  |
| Fe            | 15.928              | 14.347    | 15.738                | 15.947    | 12.64              | 13.2925   |
| Mn            | 15.0995             | 11.145    | 11.467                | 11.393    | 11.0745            | 10.674    |
| Sr            | 22.7895             | 30.9915   | 8.6105                | 22.2315   | 24.5835            | 34.0455   |

Table S3: A comparison of data on heavy metal concentrations (mg/kg) in mangrove plant reported from other mangrove ecosystems of India, Saudi Arabia and present study

| Site                        | Mangrove species             | Plant tissue | Cu    | Zn    | Fe      | Mn     | Sr    | Refereces     |
|-----------------------------|------------------------------|--------------|-------|-------|---------|--------|-------|---------------|
| Red Sea Coast, Saudi Arabia | <i>Avicennia marina</i>      | Root         | 40.02 | 18.27 | 3913.14 | 67.27  | -     | [57]          |
|                             |                              | Leaf         | 4.17  | 4.23  | 39.54   | 11.14  | -     |               |
| Tamil Nadu, India           | <i>Avicennia officinalis</i> | Leaf         | 14.8  | 107.8 | 225.3   | 87.8   | -     | [58]          |
| Kerala, India               | <i>Avicennia officinalis</i> | Leaf         | 101.7 | 119.5 | 678     | 579    | -     | [59]          |
| Mongla, Bangladesh          | <i>Avicennia officinalis</i> | Root         | 19.79 | 12.54 | 619.39  | 188.78 | 19.88 | Current study |
|                             |                              | Leaf         | 15.74 | 11.45 | 325.19  | 456.27 | 8.61  |               |

|                              |                   |      |       |       |        |        |       |               |
|------------------------------|-------------------|------|-------|-------|--------|--------|-------|---------------|
| Dhamra Estuary,<br>India     | <i>Phoenix</i>    | Root | 36.05 | 33.41 | 129.78 | 168.08 | -     | [60]          |
|                              | <i>Paludosa</i>   | Leaf | 8.21  | 18.49 | 257.82 | 29.89  | -     |               |
| Sundarban<br>Mangrove, India | <i>Sonneratia</i> | Root | 9.61  | 9.56  | 750.24 | 62.37  | -     | [25]          |
|                              | <i>apetala</i>    | Leaf | 9.34  | 16.82 | 484.52 | 323.61 | -     |               |
| Mongla,<br>Bangladesh        | <i>Sonneratia</i> | Root | 15.77 | 8.52  | 834.55 | 138.72 | 21.18 | Current study |
|                              | <i>apetala</i>    | Leaf | 12.64 | 11.11 | 760.26 | 285.65 | 24.58 |               |
| West Bengal,<br>India        | <i>Excoecaria</i> | Root | NA    | NA    | NA     | NA     | NA    | [61]          |
|                              | <i>agallocha</i>  | Leaf | 19.53 | —     | 585.11 | 533.81 | NA    |               |
| Mongla,<br>Bangladesh        | <i>Excoecaria</i> | Root | 17.93 | 12.84 | 820.78 | 125.91 | 21.87 | Current study |
|                              | <i>agallocha</i>  |      |       |       |        |        |       |               |

Kader, A.; Narayan Sinha, S. Heavy metal contamination in the sediment and plants of the Sundarbans, India. *Chemistry and Ecology*, 2018, 34(6), 506-518.

Table S4. Bioconcentration factor (BCF) and Translocation factor (TF) values in the root and leaves of three mangrove plants.

|                      | <i>E. agallocha</i> |           | <i>A. officinalis</i> |           | <i>S. apetalla</i> |           |
|----------------------|---------------------|-----------|-----------------------|-----------|--------------------|-----------|
|                      | Station 1           | Station 2 | Station 1             | Station 2 | Station 1          | Station 2 |
| <b>BCF in roots</b>  |                     |           |                       |           |                    |           |
| Cu                   | 0.21                | 0.16      | 0.23                  | 0.23      | 0.18               | 0.2       |
| Zn                   | 0.23                | 0.19      | 0.23                  | 0.23      | 0.16               | 0.17      |
| Fe                   | 0.031               | 0.032     | 0.023                 | 0.023     | 0.031              | 0.018     |
| Mn                   | 1.42                | 2.79      | 2.13                  | 2.13      | 1.56               | 1.49      |
| Sr                   | 0.11                | 0.06      | 0.1                   | 0.1       | 0.11               | 0.09      |
| <b>BCF in leaves</b> |                     |           |                       |           |                    |           |
| Cu                   | 0.17                | 0.2       | 0.18                  | 0.19      | 0.15               | 0.16      |
| Zn                   | 0.27                | 0.2       | 0.21                  | 0.21      | 0.2                | 0.19      |
| Fe                   | 0.027               | 0.017     | 0.012                 | 0.018     | 0.028              | 0.014     |
| Mn                   | 1.69                | 1.78      | 5.14                  | 1.48      | 3.22               | 1.64      |
| Sr                   | 0.15                | 0.13      | 0.04                  | 0.13      | 0.12               | 0.2       |

| TF in leaves |      |      |      |      |      |      |
|--------------|------|------|------|------|------|------|
| Cu           | 0.8  | 1.24 | 0.79 | 0.97 | 0.8  | 0.81 |
| Zn           | 1.18 | 1.08 | 0.91 | 1.29 | 1.3  | 1.14 |
| Fe           | 0.87 | 0.52 | 0.53 | 0.77 | 0.91 | 0.76 |
| Mn           | 1.19 | 0.64 | 2.42 | 0.7  | 1.72 | 1.11 |
| Sr           | 1.42 | 2.21 | 0.43 | 1.9  | 1.16 | 2.29 |
